# Supplementary material for: Subsurface Hydrocarbon Degradation Strategies in Low- and High-Sulfate Coal Seam Communities Identified with Activity-Based Metagenomics
Source: bioRxiv or medRxiv preprint supplement (doi:10.1101/2021.08.26.457739), 2021-10-15

# Completion (%)

# Redundancy(%)

- ahyB
- edbA
- edbB
- cmdB
- ppsA
- ppsB
- ppcC
- assD
- bssD
- tutE
- masG
- ibsD
- abcA
- Phthalate
- LigB
- est
- lch
- srf
- dsrA
- mcrA

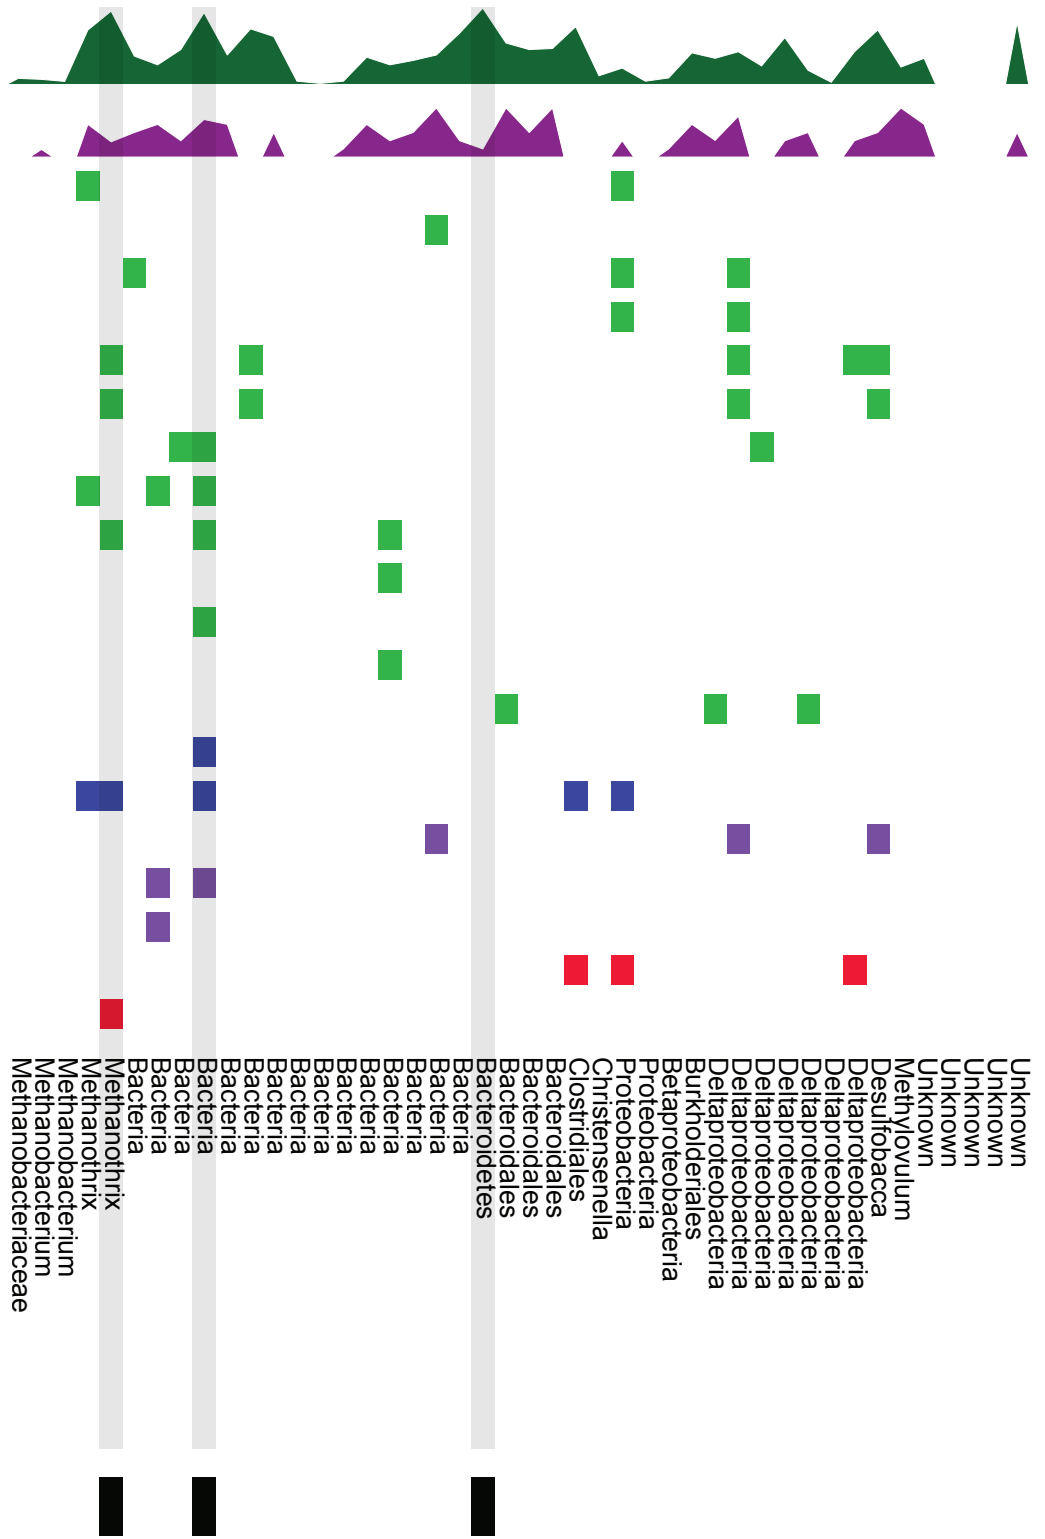

Supplement: Supplementary file [file media-2.pdf]
